# Supplementary material
Source: Springer Nature journal article supplement (https://www.springermedizin.de/resource/supplementary/12993_2011_347_MOESM2_ESM.pdf/9617594)

Abrupt object recognition  
contrast threshold (%)

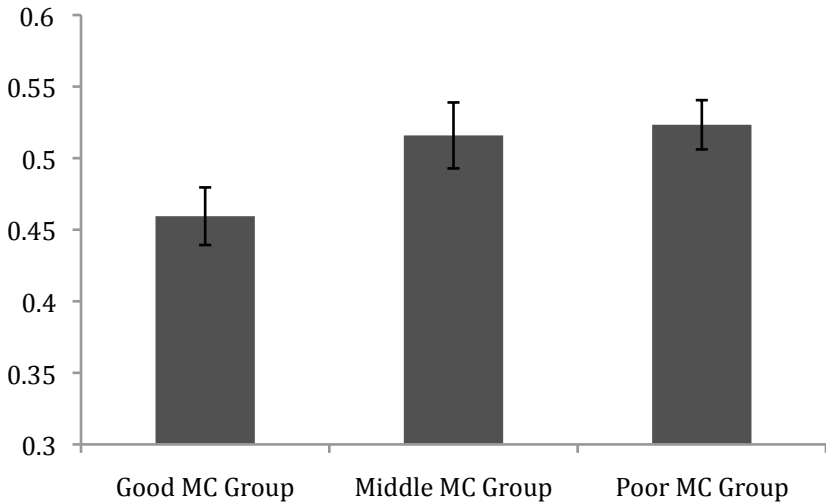

Motion Coherence (MC) Groups

Supplement: MOESM2 [file 9617594]
